# Supplementary material for: Active Nanointerfaces Based on Enzyme Carbonic Anhydrase and Metal–Organic Framework for Carbon Dioxide Reduction
Source: Nanomaterials (Basel). 2021 Apr 15;11(4):1008. doi: 10.3390/nano11041008 (PMC8071118; doi:10.3390/nano11041008)
Supplement: Supplementary file 1 [file nanomaterials-11-01008-s001.zip › nanomaterials-1165155-supplementary.pdf]

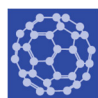

## Supporting Information

# Active Nanointerfaces Based on Enzyme Carbonic Anhydrase and Metal–Organic Framework for Carbon Dioxide Reduction

Qian Liu, Xinwei Bai, Huy Pham, Jianli Hu and Cerasela Zoica Dinu \*

Department of Chemical and Biomedical Engineering, West Virginia University, Morgantown, WV 26506, USA; ql0009@mix.wvu.edu (Q.L.); xb0001@mix.wvu.edu (X.B.); hgpham@mix.wvu.edu (H.P.); john.hu@mail.wvu.edu (J.H.)

\* Correspondence: Cerasela-Zoica.Dinu@mail.wvu.edu; Tel.: +1-304-293-9338

## Schemes, Figures and Tables

*“In house”* platform built to evaluate changes in the CO<sub>2</sub> concentration as resulted upon gas adsorption at the CA-membrane interface. The unit integrated a micro GC, a mass flow controller and a membrane module; the micro GC was used to monitor the concentration of CO<sub>2</sub> gas and any differences in the gas concentration in the inlet and outlet of the pipeline respectively. The mass flow reactor was used to control the gas flow, while the membrane module was used to store the CA-based interface where the CO<sub>2</sub> adsorption was to occur.

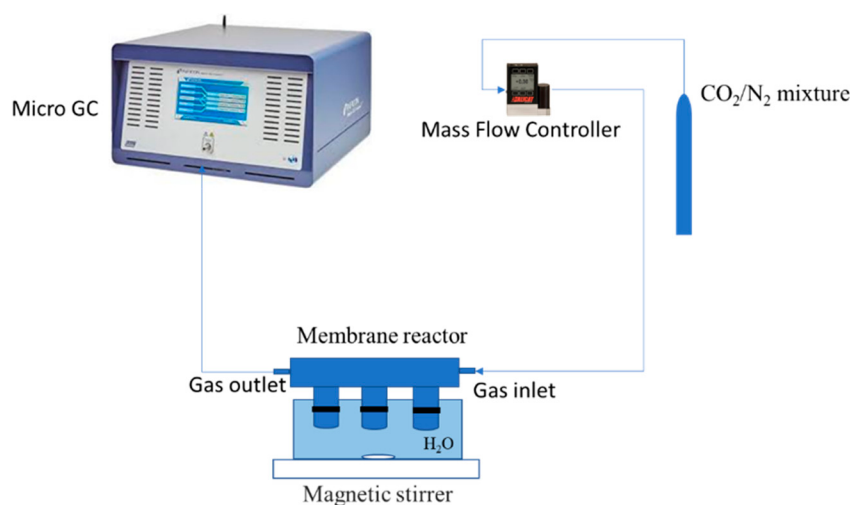

**Scheme 1.** Schematic illustration of *“in house”* platform used to evaluate changes in CO<sub>2</sub> concentration at the enzymatic membrane interface.

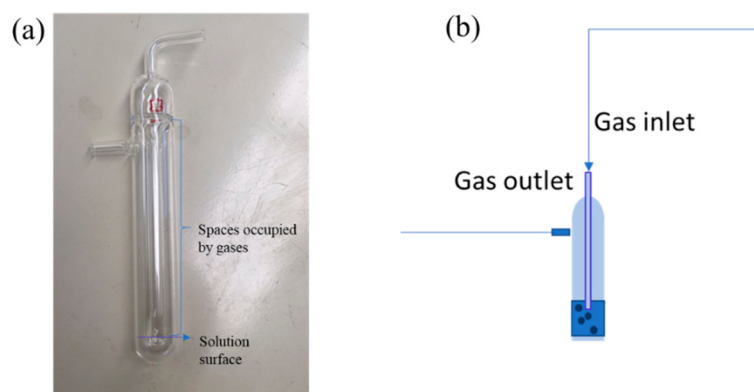

**Scheme S2.** Schematic illustration of the reactor used for monitoring changes in CO<sub>2</sub> concentration upon gas interaction with a solution containing free CA.

AFM in AC mode was used to evaluate changes in samples height profiles as resulted from sample functionalization. Results showed significant height changes upon FDCA binding onto the filter's surface.

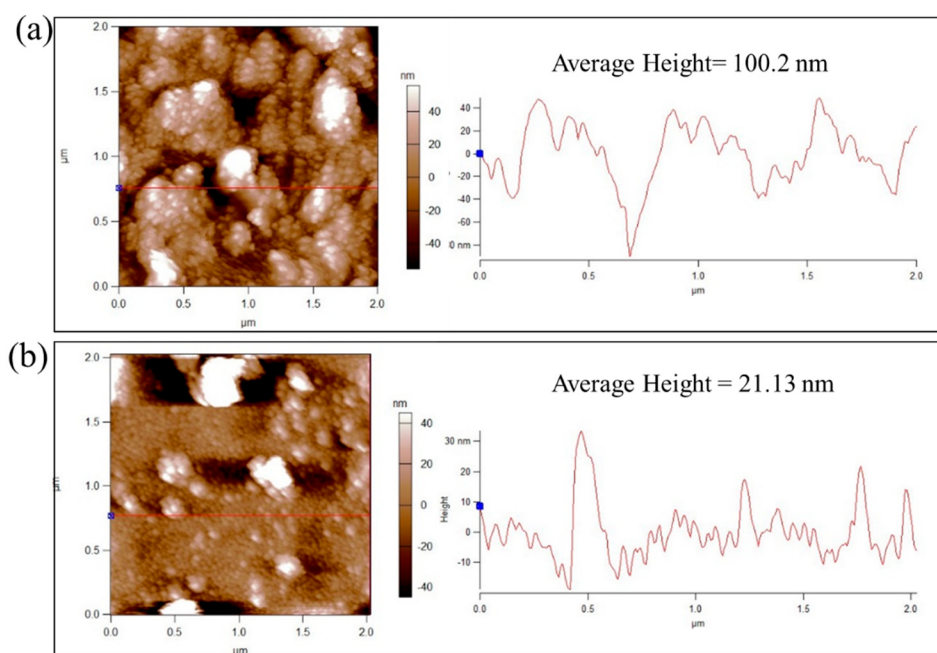

**Figure S1.** AFM images of FDCA/Al<sub>2</sub>O<sub>3</sub> functionalized filter (a) and Al<sub>2</sub>O<sub>3</sub> filter (b) with their corresponding average height profile.

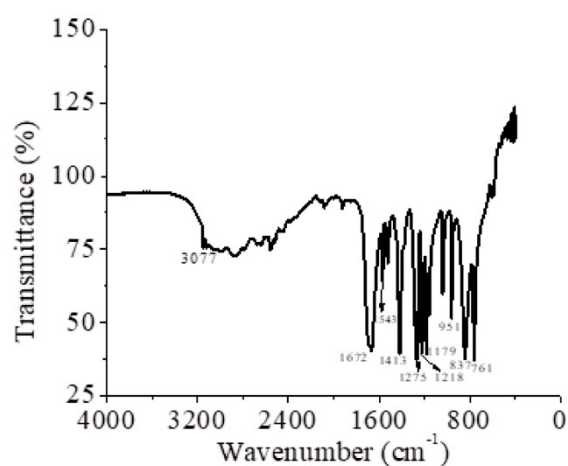

Figure S2. FTIR spectra of FDCA linker.

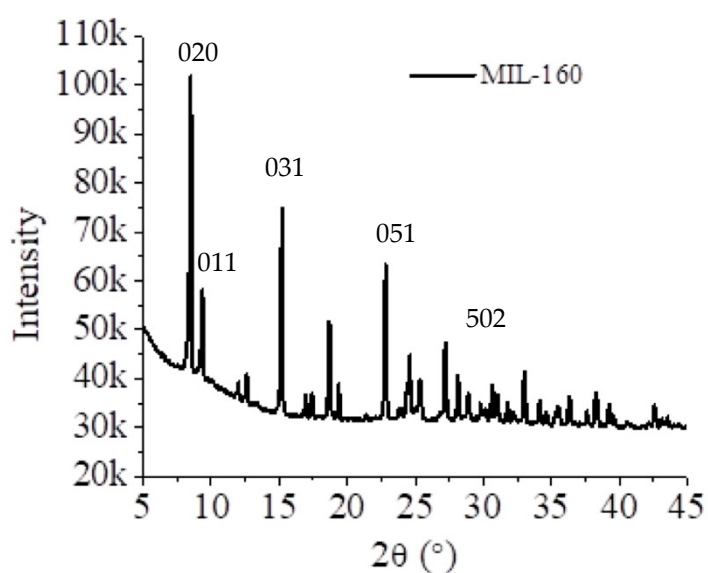

Figure 3. XRD spectra of the MOF.

Table 1. Elemental composition of control and FDCA/Al<sub>2</sub>O<sub>3</sub> functionalized filter.

| Sample                              | Element | Atomic concentration (%) |
|-------------------------------------|---------|--------------------------|
| Al <sub>2</sub> O <sub>3</sub>      | C K     | 8.59 ± 0.36              |
|                                     | O K     | 37.48 ± 0.19             |
|                                     | Al K    | 53.93 ± 0.21             |
| FDCA/Al <sub>2</sub> O <sub>3</sub> | C K     | 12.45 ± 0.08             |
|                                     | O K     | 44.45 ± 0.11             |
|                                     | Al K    | 43.11 ± 0.09             |

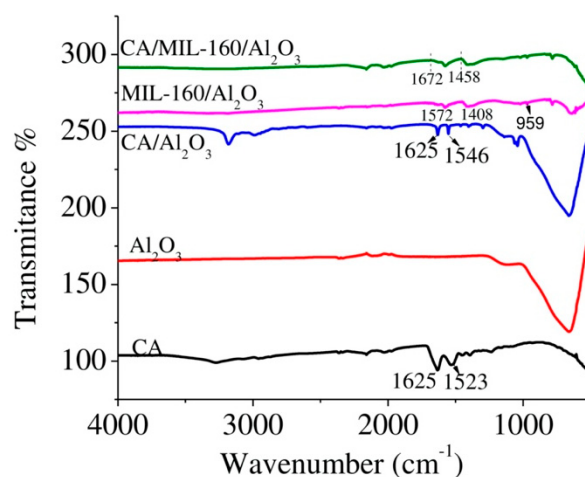

**Figure 4.** FTIR analysis of membranes and controls.

Equations S1–3 supporting previously established mechanism for CO<sub>2</sub> transformation by CA

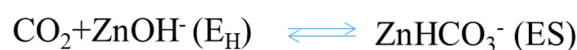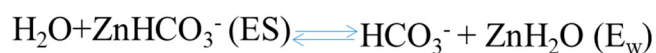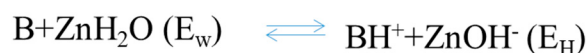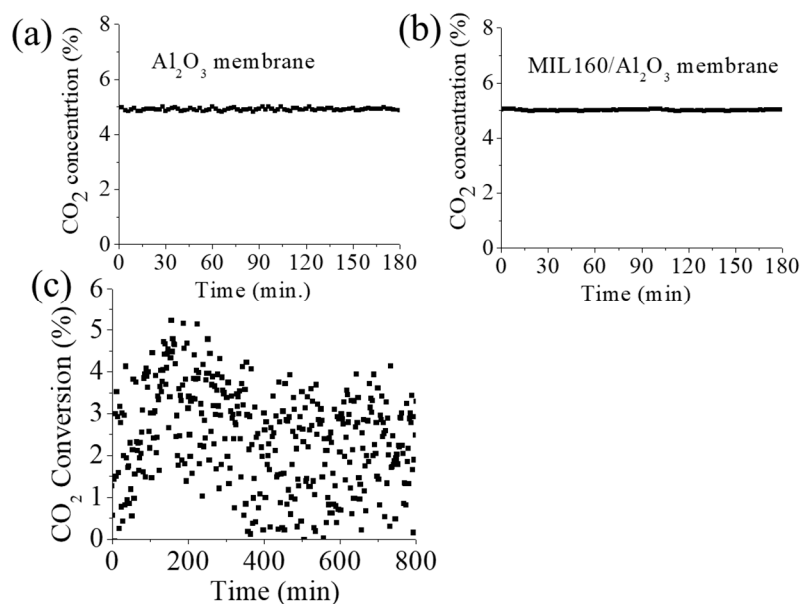

**Figure 5.** CO<sub>2</sub> adsorption at the Al<sub>2</sub>O<sub>3</sub> filter (a), MIL-160/Al<sub>2</sub>O<sub>3</sub> hybrid (b) and free CA in deionized water (c) interfaces.

**Table S2.** Comparison of the CO<sub>2</sub> hydration efficiency of the user synthesized CA/MIL-160/Al<sub>2</sub>O<sub>3</sub> relative to other reports.

| Membrane                                  | CO <sub>2</sub> hydration rate, mol s <sup>-1</sup> m <sup>-2</sup> | Effective Membrane area, m <sup>2</sup> | Solvent | Reference |
|-------------------------------------------|---------------------------------------------------------------------|-----------------------------------------|---------|-----------|
| CA/MIL-160/Al <sub>2</sub> O <sub>3</sub> | $1.8 \times 10^{-2}$                                                | $1.2 \times 10^{-4}$                    | Water   | This work |
| CA-FTCS-CNTs-PVDF flat sheet membrane     | $2.1 \times 10^{-4}$                                                | -----                                   | Water   | 3         |
| CA-PDA-PEI-PVDF hollow fiber membrane     | $2.5 \times 10^{-3}$                                                | $6.4 \times 10^{-4}$                    | Water   | 4         |
